# Supplementary material
Source: PubMed Central journal article supplement (PMC9305984)
Supplement: NIHMS1823841-supplement-Supplement.pdf [file NIHMS1823841-supplement-Supplement.pdf]

**Supplementary Materials**

**Of**

**Benefits of Deep Learning Classification of Continuous Noninvasive**

**Brain-Computer Interface Control**

James R. Stieger<sup>1,2</sup>, Stephen A. Engel<sup>1,2</sup>, Daniel Suma<sup>1</sup>, Bin He<sup>1\*</sup>

1. Carnegie Mellon University, Pittsburgh, PA
2. University of Minnesota, Minneapolis, MN

## Statistical Tables

|            | DF | RD    | Mean RD | F      | p-value  | significance |
|------------|----|-------|---------|--------|----------|--------------|
| Session    | 10 | 5.58  | 0.56    | 17.08  | <0.00001 | ***          |
| Model Type | 3  | 19.47 | 6.49    | 198.66 | <0.00001 | ***          |
| Type:Task  | 30 | 0.78  | 0.026   | 0.79   | 0.78     |              |

**Table S1 | Parameters and statistics for modeling probability of correct class membership** A significant main effect of model type was observed when modeling the probability of correct class membership. Independent variables include model type (4 Levels: CSP-All, CSP-Motor, CNN-All, CNN-Motor) and session (11 levels).

|             | Estimate | Std. Error | t-value | p-value  | significance |
|-------------|----------|------------|---------|----------|--------------|
| (intercept) | 18868926 | 38639      | 48.37   | <0.00001 | ***          |
| CNN-All     | -546597  | 51449      | -10.62  | <0.00001 | ***          |
| CSP-Motor   | -114792  | 51449      | -2.23   | 0.027    | *            |
| CNN-Motor   | -407927  | 51449      | -7.93   | <0.00001 | ***          |

**Table S2 | Parameters and statistics for modeling area under the curve** A Wald test rejected the null hypothesis that all model types have the same rank. Overall Wald test: 145.44, P<0.00001.

|             | Estimate | Std. Error | t-value | p-value  | significance |
|-------------|----------|------------|---------|----------|--------------|
| (intercept) | 2.52     | 0.045      | 56.10   | <0.00001 | ***          |
| CNN-All     | -0.37    | 0.054      | -6.82   | <0.00001 | ***          |
| CSP-Motor   | -0.023   | 0.054      | -0.43   | 0.67     |              |
| CNN-Motor   | -0.044   | 0.054      | -0.81   | 0.42     |              |

**Table S3 | Parameters and statistics for modeling average trial length** A Wald test rejected the null hypothesis that all model types have the same rank. Overall Wald test: 62.30, P<0.00001.

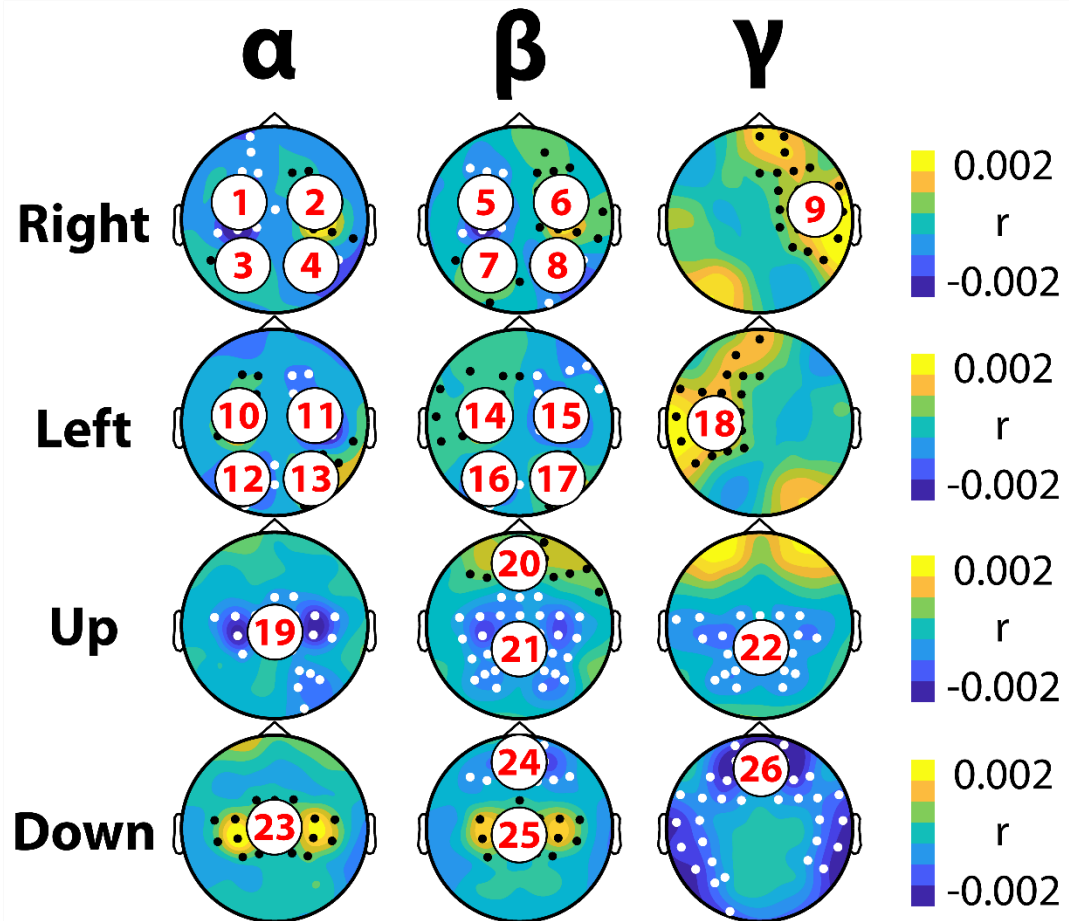

**Figure S2 | Feature Importance Maps Display Multiple Biomarkers Used in Continuous BCI Control.** Using the input-perturbation network-prediction correlation method, feature importance maps were created for each motor imagery strategy. Warm colors occur when increases in power over these areas increase the classification accuracy, while cool colors occur when decreases in power increase the classification accuracy (or vice-versa). Black dots represent significant clusters of positive correlation and white dots represent significant clusters of negative correlation. All clusters had a significance level lower than the Bonferroni threshold for multiple comparisons ( $P < 0.0042$ ). Cluster labels (red numbers) represent the rows in Table S4.

| Cluster Number | Trial type | Power Band | Location           | Sign | cluster stat maxsum( $t_{60}$ ) | p-value | significance |
|----------------|------------|------------|--------------------|------|---------------------------------|---------|--------------|
| 1              | Right      | Alpha      | L-Motor            | -    | -45.29                          | 0.0002  | ***          |
| 2              | Right      | Alpha      | R-Motor            | +    | 37.56                           | 0.0002  | ***          |
| 3              | Right      | Alpha      | L-Occipital        | +    | 32.30                           | 0.0002  | ***          |
| 4              | Right      | Alpha      | R-Occipital        | -    | -34.00                          | 0.0002  | ***          |
| 5              | Right      | Beta       | L-Motor            | -    | -42.07                          | 0.0002  | ***          |
| 6              | Right      | Beta       | R-Motor            | +    | 61.90                           | 0.0002  | ***          |
| 7              | Right      | Beta       | L-Occipital        | +    | 43.06                           | 0.0002  | ***          |
| 8              | Right      | Beta       | R-Occipital        | -    | -23.96                          | 0.0004  | ***          |
| 9              | Right      | Gamma      | R-Temporal/Frontal | +    | 92.96                           | 0.0008  | ***          |
| 10             | Left       | Alpha      | L-Motor            | +    | 47.60                           | 0.0002  | ***          |
| 11             | Left       | Alpha      | R-Motor            | -    | -42.01                          | 0.0002  | ***          |
| 12             | Left       | Alpha      | L-Occipital        | -    | -28.44                          | 0.0002  | ***          |
| 13             | Left       | Alpha      | R-Occipital        | +    | 29.83                           | 0.0004  | ***          |
| 14             | Left       | Beta       | L-Motor            | +    | 52.90                           | 0.0002  | ***          |
| 15             | Left       | Beta       | R-Motor            | -    | -58.94                          | 0.0002  | ***          |
| 16             | Left       | Beta       | L-Occipital        | -    | -24.09                          | 0.0006  | ***          |
| 17             | Left       | Beta       | R-Occipital        | +    | 39.10                           | 0.0002  | ***          |
| 18             | Left       | Gamma      | L-Temporal/Frontal | +    | 89.65                           | 0.0006  | ***          |
| 19             | Up         | Alpha      | Motor/R-Occipital  | -    | -68.03                          | 0.0002  | ***          |
| 20             | Up         | Beta       | Frontal            | +    | 38.66                           | 0.0002  | ***          |
| 21             | Up         | Beta       | Motor/Occipital    | -    | -99.45                          | 0.0002  | ***          |
| 22             | Up         | Gamma      | Motor/Occipital    | -    | -69.31                          | 0.003   | **           |
| 23             | Down       | Alpha      | Motor              | +    | 77.99                           | 0.0002  | ***          |
| 24             | Down       | Beta       | Frontal            | -    | -37.95                          | 0.0002  | ***          |
| 25             | Down       | Beta       | Motor              | +    | 71.28                           | 0.0002  | ***          |
| 26             | Down       | Gamma      | Frontal/Temporal   | -    | -164.99                         | 0.0002  | ***          |

**Table S4 | Feature Importance Maps Display Multiple Biomarkers Used in Continuous BCI Control.** Unique band power measures were found to correlate significantly differently with classification accuracy depending on the motor imagery strategy employed. All clusters had a significance level lower than the Bonferroni threshold for multiple comparisons ( $P < 0.0042$ ).
